# Supplementary material for: A Mathematical Approach with Fractional Calculus for the Modelling of Children’s Physical Development
Source: Hindawi journal article supplement (doi:10.1155/2019/3081264), 2019-09-12
Supplement: f1 [file 3081264.f1.pdf]

TABLE S1: Age-height percentile values of 0-18 years old children.

| Age-Height Percentile Values (cm) |       |       |       |       |       |       |               |       |       |       |       |       |       |       |
|-----------------------------------|-------|-------|-------|-------|-------|-------|---------------|-------|-------|-------|-------|-------|-------|-------|
| Boy                               |       |       |       |       |       |       | Age           | Girl  |       |       |       |       |       |       |
| 3                                 | 10    | 25    | 50    | 75    | 90    | 97    |               | 3     | 10    | 25    | 50    | 75    | 90    | 97    |
| 45.9                              | 47.2  | 48.5  | 50.0  | 51.5  | 52.9  | 54.2  | <b>Birth</b>  | 45.3  | 46.6  | 47.9  | 49.4  | 50.8  | 52.1  | 53.4  |
| 56.2                              | 57.8  | 59.5  | 61.3  | 63.2  | 64.8  | 66.4  | <b>3 m.</b>   | 55.3  | 56.8  | 58.2  | 59.9  | 61.5  | 63.0  | 64.5  |
| 62.8                              | 64.5  | 66.2  | 68.0  | 69.9  | 71.6  | 73.2  | <b>6 m.</b>   | 61.6  | 63.1  | 64.7  | 66.4  | 68.2  | 69.7  | 71.3  |
| 67.4                              | 69.1  | 70.9  | 72.8  | 74.7  | 76.4  | 78.1  | <b>9 m.</b>   | 66.0  | 67.7  | 69.3  | 71.2  | 73.0  | 74.6  | 76.3  |
| 70.8                              | 72.7  | 74.7  | 76.9  | 79.1  | 81.1  | 83.0  | <b>12 m.</b>  | 69.7  | 71.4  | 73.2  | 75.1  | 77.1  | 78.8  | 80.5  |
| 73.8                              | 75.8  | 77.9  | 80.2  | 82.5  | 84.5  | 86.6  | <b>15 m.</b>  | 72.8  | 74.6  | 76.5  | 78.5  | 80.6  | 82.4  | 84.2  |
| 76.4                              | 78.5  | 80.7  | 83.1  | 85.5  | 87.7  | 89.8  | <b>18 m.</b>  | 75.5  | 77.4  | 79.3  | 81.5  | 83.7  | 85.6  | 87.6  |
| 81.0                              | 83.3  | 85.6  | 88.2  | 90.8  | 93.2  | 95.5  | <b>2 y.</b>   | 80.1  | 82.3  | 84.4  | 86.8  | 89.2  | 91.4  | 93.5  |
| 85.3                              | 87.6  | 90.0  | 92.6  | 95.3  | 97.6  | 100.0 | <b>2.5 y.</b> | 84.0  | 86.3  | 88.6  | 91.2  | 93.8  | 96.1  | 98.4  |
| 89.3                              | 91.7  | 94.1  | 96.8  | 99.4  | 101.8 | 104.2 | <b>3 y.</b>   | 87.8  | 90.2  | 92.7  | 95.4  | 98.1  | 100.6 | 103.0 |
| 92.8                              | 95.2  | 97.7  | 100.5 | 103.2 | 105.7 | 108.2 | <b>3.5 y.</b> | 91.1  | 93.6  | 96.2  | 99.0  | 101.9 | 104.5 | 107.0 |
| 96.0                              | 98.6  | 101.1 | 104.0 | 106.9 | 109.5 | 112.0 | <b>4 y.</b>   | 94.3  | 96.9  | 99.6  | 102.5 | 105.5 | 108.1 | 110.7 |
| 99.0                              | 101.7 | 104.3 | 107.3 | 110.3 | 113.0 | 115.6 | <b>4.5 y.</b> | 97.4  | 100.1 | 102.8 | 105.9 | 108.9 | 111.6 | 114.3 |
| 101.8                             | 104.5 | 107.3 | 110.4 | 113.5 | 116.2 | 119.0 | <b>5 y.</b>   | 100.4 | 103.2 | 105.9 | 109.1 | 112.2 | 114.9 | 117.7 |
| 104.5                             | 107.3 | 110.1 | 113.3 | 116.4 | 119.3 | 122.1 | <b>5.5 y.</b> | 103.6 | 106.3 | 109.0 | 112.1 | 115.3 | 118.3 | 121.2 |
| 107.1                             | 110.0 | 112.9 | 116.1 | 119.3 | 122.2 | 125.1 | <b>6 y.</b>   | 106.2 | 109.0 | 111.9 | 115.1 | 118.4 | 121.3 | 124.1 |
| 112.1                             | 115.1 | 118.2 | 121.5 | 124.9 | 128.0 | 131.0 | <b>7 y.</b>   | 111.6 | 114.6 | 117.7 | 121.1 | 124.4 | 127.5 | 130.5 |
| 116.9                             | 120.0 | 123.3 | 126.9 | 130.5 | 133.7 | 136.9 | <b>8 y.</b>   | 116.7 | 119.9 | 123.1 | 126.7 | 130.3 | 133.5 | 136.7 |
| 121.6                             | 124.9 | 128.3 | 132.1 | 135.9 | 139.3 | 142.7 | <b>9 y.</b>   | 121.3 | 124.7 | 128.2 | 132.1 | 136.0 | 139.5 | 142.9 |
| 126.4                             | 130.0 | 133.6 | 137.6 | 141.6 | 145.2 | 148.7 | <b>10 y.</b>  | 125.8 | 129.6 | 133.5 | 137.9 | 142.2 | 146.1 | 150.0 |
| 131.7                             | 135.5 | 139.4 | 143.8 | 148.1 | 152.0 | 155.9 | <b>11 y.</b>  | 132.5 | 136.6 | 140.8 | 145.4 | 150.1 | 154.2 | 158.3 |
| 137.0                             | 141.3 | 145.7 | 150.6 | 155.4 | 159.8 | 164.1 | <b>12 y.</b>  | 141.1 | 144.9 | 148.8 | 153.1 | 157.4 | 161.2 | 165.1 |
| 142.8                             | 147.6 | 152.4 | 157.7 | 163.1 | 167.9 | 172.6 | <b>13 y.</b>  | 146.6 | 150.2 | 153.8 | 157.8 | 161.8 | 165.5 | 169.0 |
| 150.3                             | 155.0 | 159.7 | 164.9 | 170.1 | 174.8 | 179.5 | <b>14 y.</b>  | 149.3 | 152.8 | 156.4 | 160.4 | 164.3 | 167.9 | 171.4 |
| 156.9                             | 161.2 | 165.5 | 170.3 | 175.1 | 179.4 | 183.7 | <b>15 y.</b>  | 150.7 | 154.2 | 157.8 | 161.7 | 165.7 | 169.3 | 172.8 |
| 160.9                             | 164.9 | 168.9 | 173.4 | 177.9 | 181.9 | 185.9 | <b>16 y.</b>  | 151.3 | 154.8 | 158.4 | 162.4 | 166.3 | 169.9 | 173.4 |
| 163.0                             | 166.8 | 170.7 | 175.0 | 179.3 | 183.2 | 187.1 | <b>17 y.</b>  | 151.7 | 155.2 | 158.8 | 162.7 | 166.7 | 170.3 | 173.8 |
| 164.5                             | 168.2 | 172.0 | 176.2 | 180.4 | 184.2 | 187.9 | <b>18 y.</b>  | 152.0 | 155.6 | 159.1 | 163.1 | 167.1 | 170.7 | 174.2 |

TABLE S2: Age- body weight percentile values of 0-18 years old children.

| Age-Body Weight Percentile Values (kg) |       |       |       |       |       |       |               |       |       |       |       |       |       |       |
|----------------------------------------|-------|-------|-------|-------|-------|-------|---------------|-------|-------|-------|-------|-------|-------|-------|
| Boy                                    |       |       |       |       |       |       | Girl          |       |       |       |       |       |       |       |
| 3                                      | 10    | 25    | 50    | 75    | 90    | 97    | Age           | 3     | 10    | 25    | 50    | 75    | 90    | 97    |
| 2.58                                   | 2.85  | 3.13  | 3.43  | 3.73  | 4.00  | 4.27  | <b>Birth</b>  | 2.52  | 2.76  | 3.01  | 3.29  | 3.58  | 3.84  | 4.10  |
| 4.75                                   | 5.26  | 5.79  | 6.38  | 6.99  | 7.54  | 8.10  | <b>3 m.</b>   | 4.48  | 4.90  | 5.33  | 5.82  | 6.32  | 6.78  | 7.24  |
| 6.21                                   | 6.79  | 7.41  | 8.12  | 8.85  | 9.54  | 10.25 | <b>6 m.</b>   | 5.94  | 6.38  | 6.85  | 7.43  | 8.06  | 8.68  | 9.34  |
| 7.27                                   | 7.87  | 8.51  | 9.26  | 10.06 | 10.81 | 11.58 | <b>9 m.</b>   | 6.85  | 7.34  | 7.89  | 8.55  | 9.29  | 10.02 | 10.82 |
| 7.96                                   | 8.61  | 9.32  | 10.16 | 11.05 | 11.92 | 12.82 | <b>12 m.</b>  | 7.52  | 8.06  | 8.66  | 9.39  | 10.20 | 11.00 | 11.87 |
| 8.61                                   | 9.28  | 10.01 | 10.89 | 11.83 | 12.75 | 13.72 | <b>15 m.</b>  | 8.09  | 8.67  | 9.31  | 10.10 | 10.96 | 11.81 | 12.73 |
| 9.13                                   | 9.82  | 10.58 | 11.49 | 12.48 | 13.46 | 14.49 | <b>18 m.</b>  | 8.57  | 9.19  | 9.87  | 10.71 | 11.63 | 12.55 | 13.54 |
| 10.12                                  | 10.85 | 11.66 | 12.66 | 13.76 | 14.86 | 16.05 | <b>2 y.</b>   | 9.49  | 10.20 | 10.99 | 11.94 | 12.99 | 14.03 | 15.15 |
| 11.06                                  | 11.84 | 12.71 | 13.80 | 15.04 | 16.29 | 17.69 | <b>2.5 y.</b> | 10.35 | 11.17 | 12.06 | 13.12 | 14.25 | 15.33 | 16.47 |
| 11.81                                  | 12.65 | 13.61 | 14.83 | 16.24 | 17.71 | 19.39 | <b>3 y.</b>   | 11.19 | 12.09 | 13.05 | 14.18 | 15.37 | 16.51 | 17.68 |
| 12.6                                   | 13.5  | 14.6  | 15.9  | 17.4  | 18.9  | 20.6  | <b>3.5 y.</b> | 11.9  | 12.8  | 13.9  | 15.1  | 16.5  | 17.8  | 19.3  |
| 13.3                                   | 14.3  | 15.4  | 16.8  | 18.5  | 20.1  | 22.0  | <b>4 y.</b>   | 12.7  | 13.7  | 14.8  | 16.1  | 17.7  | 19.2  | 20.8  |
| 14.0                                   | 15.0  | 16.2  | 17.7  | 19.5  | 21.3  | 23.3  | <b>4.5 y.</b> | 13.5  | 14.5  | 15.8  | 17.3  | 19.0  | 20.7  | 22.5  |
| 14.7                                   | 15.8  | 17.0  | 18.6  | 20.5  | 22.4  | 24.6  | <b>5 y.</b>   | 14.2  | 15.4  | 16.7  | 18.4  | 20.3  | 22.2  | 24.3  |
| 15.4                                   | 16.5  | 17.9  | 19.6  | 21.6  | 23.6  | 26.0  | <b>5.5 y.</b> | 14.9  | 16.2  | 17.7  | 19.5  | 21.6  | 23.7  | 26.1  |
| 16.2                                   | 17.4  | 18.9  | 20.7  | 22.8  | 25.1  | 27.7  | <b>6 y.</b>   | 15.7  | 17.0  | 18.6  | 20.6  | 22.9  | 25.3  | 27.9  |
| 18.1                                   | 19.5  | 21.1  | 23.2  | 25.8  | 28.5  | 31.6  | <b>7 y.</b>   | 17.2  | 18.7  | 20.6  | 22.9  | 25.7  | 28.6  | 31.9  |
| 19.9                                   | 21.5  | 23.4  | 25.9  | 28.9  | 32.2  | 36.1  | <b>8 y.</b>   | 18.9  | 20.8  | 22.9  | 25.7  | 28.9  | 32.4  | 36.5  |
| 21.7                                   | 23.6  | 25.8  | 28.8  | 32.4  | 36.4  | 41.3  | <b>9 y.</b>   | 20.9  | 23.1  | 25.6  | 28.9  | 32.8  | 37.0  | 41.8  |
| 23.6                                   | 25.9  | 28.6  | 32.2  | 36.7  | 41.6  | 47.8  | <b>10 y.</b>  | 23.0  | 25.6  | 28.7  | 32.6  | 37.3  | 42.3  | 48.0  |
| 26.6                                   | 29.6  | 33.1  | 37.8  | 43.6  | 50.0  | 57.8  | <b>11 y.</b>  | 26.4  | 29.6  | 33.4  | 38.2  | 43.7  | 49.5  | 55.9  |
| 29.9                                   | 33.8  | 38.4  | 44.3  | 51.3  | 58.7  | 67.1  | <b>12 y.</b>  | 32.0  | 35.8  | 39.9  | 45.1  | 50.9  | 56.8  | 63.1  |
| 33.4                                   | 38.0  | 43.2  | 49.8  | 57.3  | 64.9  | 73.3  | <b>13 y.</b>  | 37.4  | 41.1  | 45.1  | 50.0  | 55.5  | 60.8  | 66.6  |
| 39.1                                   | 44.0  | 49.4  | 56.2  | 63.9  | 71.6  | 80.1  | <b>14 y.</b>  | 41.6  | 45.0  | 48.8  | 53.3  | 58.3  | 63.2  | 68.5  |
| 45.3                                   | 50.1  | 55.4  | 62.1  | 69.7  | 77.4  | 85.9  | <b>15 y.</b>  | 44.0  | 47.3  | 50.9  | 55.3  | 60.1  | 64.8  | 69.8  |
| 49.9                                   | 54.5  | 59.7  | 66.2  | 73.6  | 81.2  | 89.6  | <b>16 y.</b>  | 45.3  | 48.5  | 52.0  | 56.3  | 61.0  | 65.7  | 70.7  |
| 53.2                                   | 57.8  | 62.8  | 69.2  | 76.5  | 84.0  | 92.4  | <b>17 y.</b>  | 46.2  | 49.4  | 52.9  | 57.2  | 61.8  | 66.4  | 71.4  |
| 56.1                                   | 60.5  | 65.5  | 71.8  | 79.0  | 86.4  | 94.7  | <b>18 y.</b>  | 47.3  | 50.5  | 53.9  | 58.1  | 62.2  | 67.3  | 72.2  |

TABLE S3: Age- body mass index percentile values of 0-18 years old children.

| Age-Body Mass Index Percentile Values (kg/m <sup>2</sup> ) |      |      |      |      |      |      |               |      |      |      |      |      |      |      |
|------------------------------------------------------------|------|------|------|------|------|------|---------------|------|------|------|------|------|------|------|
| Boy                                                        |      |      |      |      |      |      | Girl          |      |      |      |      |      |      |      |
| 5                                                          | 15   | 25   | 50   | 75   | 85   | 95   | Age           | 5    | 15   | 25   | 50   | 75   | 85   | 95   |
| 11.4                                                       | 12.2 | 12.7 | 13.7 | 14.6 | 15.2 | 16.1 | <b>Birth</b>  | 11.4 | 12.2 | 12.6 | 13.5 | 14.4 | 14.9 | 15.8 |
| 14.4                                                       | 15.3 | 15.8 | 16.9 | 18.0 | 18.6 | 19.7 | <b>3 m.</b>   | 13.9 | 14.8 | 15.3 | 16.3 | 17.3 | 17.9 | 18.9 |
| 15.0                                                       | 15.9 | 16.5 | 17.5 | 18.6 | 19.2 | 20.3 | <b>6 m.</b>   | 14.7 | 15.4 | 15.9 | 16.9 | 18.0 | 18.6 | 19.7 |
| 15.1                                                       | 16.0 | 16.5 | 17.5 | 18.6 | 19.3 | 20.4 | <b>9 m.</b>   | 14.8 | 15.5 | 16.0 | 17.0 | 18.0 | 18.6 | 19.8 |
| 14.9                                                       | 15.7 | 16.2 | 17.2 | 18.3 | 18.9 | 20.0 | <b>12 m.</b>  | 14.6 | 15.3 | 15.7 | 16.6 | 17.7 | 18.2 | 19.4 |
| 14.7                                                       | 15.5 | 16.0 | 17.0 | 18.0 | 18.6 | 19.7 | <b>15 m.</b>  | 14.5 | 15.1 | 15.6 | 16.4 | 17.4 | 18.0 | 19.1 |
| 14.5                                                       | 15.3 | 15.7 | 16.7 | 17.7 | 18.3 | 19.3 | <b>18 m.</b>  | 14.2 | 14.9 | 15.3 | 16.2 | 17.1 | 17.7 | 18.8 |
| 14.3                                                       | 15.0 | 15.4 | 16.3 | 17.3 | 17.9 | 19.0 | <b>2 y.</b>   | 14.0 | 14.6 | 15.1 | 15.9 | 16.9 | 17.4 | 18.5 |
| 14.2                                                       | 14.8 | 15.3 | 16.2 | 17.2 | 17.7 | 18.8 | <b>2.5 y.</b> | 13.9 | 14.6 | 15.0 | 15.8 | 16.7 | 17.3 | 18.3 |
| 13.9                                                       | 14.6 | 15.0 | 15.9 | 17.0 | 17.6 | 18.7 | <b>3 y.</b>   | 13.8 | 14.4 | 14.8 | 15.5 | 16.4 | 17.0 | 17.9 |
| 13.8                                                       | 14.5 | 14.9 | 15.8 | 16.8 | 17.4 | 18.5 | <b>3.5 y.</b> | 13.7 | 14.3 | 14.7 | 15.5 | 16.4 | 17.0 | 18.0 |
| 13.7                                                       | 14.4 | 14.8 | 15.7 | 16.7 | 17.3 | 18.4 | <b>4 y.</b>   | 13.6 | 14.2 | 14.6 | 15.4 | 16.4 | 17.0 | 18.1 |
| 13.6                                                       | 14.2 | 14.7 | 15.6 | 16.6 | 17.2 | 18.4 | <b>4.5 y.</b> | 13.5 | 14.2 | 14.6 | 15.4 | 16.5 | 17.1 | 18.2 |
| 13.5                                                       | 14.2 | 14.6 | 15.5 | 16.5 | 17.1 | 18.3 | <b>5 y.</b>   | 13.4 | 14.1 | 14.5 | 15.4 | 16.5 | 17.2 | 18.5 |
| 13.4                                                       | 14.1 | 14.5 | 15.4 | 16.5 | 17.1 | 18.4 | <b>5.5 y.</b> | 13.4 | 14.0 | 14.5 | 15.5 | 16.6 | 17.3 | 18.8 |
| 13.4                                                       | 14.1 | 14.5 | 15.4 | 16.5 | 17.2 | 18.5 | <b>6 y.</b>   | 13.3 | 14.0 | 14.5 | 15.5 | 16.7 | 17.5 | 19.1 |
| 13.6                                                       | 14.3 | 14.7 | 15.7 | 16.9 | 17.6 | 19.1 | <b>7 y.</b>   | 13.3 | 14.0 | 14.5 | 15.6 | 16.9 | 17.8 | 19.7 |
| 13.8                                                       | 14.5 | 15.0 | 16.1 | 17.4 | 18.2 | 19.9 | <b>8 y.</b>   | 13.4 | 14.2 | 14.7 | 15.9 | 17.4 | 18.4 | 20.4 |
| 14.0                                                       | 14.8 | 15.3 | 16.5 | 18.0 | 19.0 | 21.0 | <b>9 y.</b>   | 13.6 | 14.5 | 15.1 | 16.4 | 18.1 | 19.2 | 21.5 |
| 14.1                                                       | 15.1 | 15.7 | 17.1 | 18.9 | 20.1 | 22.5 | <b>10 y.</b>  | 13.9 | 14.9 | 15.6 | 17.1 | 19.0 | 20.2 | 22.6 |
| 14.6                                                       | 15.8 | 16.5 | 18.2 | 20.4 | 21.7 | 24.5 | <b>11 y.</b>  | 14.5 | 15.6 | 16.4 | 18.0 | 20.0 | 21.3 | 23.8 |
| 15.2                                                       | 16.5 | 17.4 | 19.3 | 21.7 | 23.1 | 26.0 | <b>12 y.</b>  | 15.3 | 16.5 | 17.3 | 19.0 | 21.1 | 22.3 | 24.8 |
| 15.6                                                       | 17.0 | 18.0 | 19.9 | 22.3 | 23.7 | 26.5 | <b>13 y.</b>  | 16.3 | 17.5 | 18.3 | 19.9 | 21.9 | 23.1 | 25.4 |
| 16.4                                                       | 17.7 | 18.6 | 20.5 | 22.8 | 24.2 | 27.0 | <b>14 y.</b>  | 17.1 | 18.3 | 19.0 | 20.6 | 22.5 | 23.6 | 25.8 |
| 17.2                                                       | 18.5 | 19.4 | 21.2 | 23.4 | 24.8 | 27.6 | <b>15 y.</b>  | 17.7 | 18.8 | 19.5 | 21.0 | 22.8 | 23.9 | 26.0 |
| 18.0                                                       | 19.3 | 20.1 | 21.9 | 24.1 | 25.4 | 28.2 | <b>16 y.</b>  | 18.1 | 19.1 | 19.8 | 21.2 | 23.0 | 24.0 | 26.1 |
| 18.7                                                       | 19.9 | 20.7 | 22.5 | 24.7 | 26.1 | 28.8 | <b>17 y.</b>  | 18.5 | 19.5 | 20.1 | 21.5 | 23.1 | 24.2 | 26.2 |
| 19.2                                                       | 20.5 | 21.3 | 23.1 | 25.2 | 26.6 | 29.4 | <b>18 y.</b>  | 19.0 | 19.9 | 20.5 | 21.8 | 23.3 | 24.3 | 26.1 |
